# Supplementary material for: Designing Focused Chemical Libraries Enriched in Protein-Protein Interaction Inhibitors using Machine-Learning Methods
Source: PLoS Comput Biol. 2010 Mar 5;6(3):e1000695. doi: 10.1371/journal.pcbi.1000695 (PMC2832677; doi:10.1371/journal.pcbi.1000695)
Supplement: Figure S2 — Description of the protein space coverage of the 66 PPI inhibitors of the learning data set in term SCOP fold classes. The validation data set covers 27 different PPI and 21 pairs of SCOP fold classes. (0.04 MB PDF) [file pcbi.1000695.s002.pdf]

| Ligand | PPI                             | SCOP FOLD                                                                    |
|--------|---------------------------------|------------------------------------------------------------------------------|
| 1      | P53/MDM2                        | SWIB/MDM2 domain: core: 4 helices capped by two small 3-stranded beta-sheets |
| 2      | P53/MDM2                        | SWIB/MDM2 domain: core: 4 helices capped by two small 3-stranded beta-sheets |
| 3      | Ras/Raf                         | Cysteine-rich domain: dimetal(zinc)-bound alpha+beta fold                    |
| 4      | LFA-1/ICAM-1                    | Immunoglobulin-like beta-sandwich: 7 strands in 2 sheets                     |
| 5      | LFA-1/ICAM-1                    | Immunoglobulin-like beta-sandwich: 7 strands in 2 sheets                     |
| 6      | TNF-alpha/TNFRc1                | TNF receptor-like : consists of three similar disulfide-rich domains         |
| 7      | CD28 &CTLA4/B7.1                | Immunoglobulin-like beta-sandwich: 7 strands in 2 sheets                     |
| 8      | Bcl-XL/Bak-BH3                  | Toxins' membrane translocation domains: Multi-helical domains                |
| 9      | Bcl-XL/Bak-BH3                  | Toxins' membrane translocation domains: Multi-helical domains                |
| 10     | Xiap/caspase9                   | Inhibitor of apoptosis (IAP) repeat: metal(zinc)-bound alpha+beta fold       |
| 11     | Xiap/caspase3                   | Inhibitor of apoptosis (IAP) repeat: metal(zinc)-bound alpha+beta fold       |
| 12     | Rac/Trio,Tiam1                  | Ras GEF: multihelical                                                        |
| 13     | Sur-2/ESX                       | N/A: alpha-helix                                                             |
| 14     | Tubulin polymerization          | Tubulin nucleotide-binding domain-like: parallel beta-sheet of 6 strands     |
| 15     | Tubulin polymerization          | Tubulin nucleotide-binding domain-like: parallel beta-sheet of 6 strands     |
| 16     | Tubulin polymerization          | Tubulin nucleotide-binding domain-like: parallel beta-sheet of 6 strands     |
| 17     | Tubulin polymerization          | Tubulin nucleotide-binding domain-like: parallel beta-sheet of 6 strands     |
| 18     | Xiap/caspase9                   | Inhibitor of apoptosis (IAP) repeat: metal(zinc)-bound alpha+beta fold       |
| 19     | ZipA/FtsZ                       | TBP-like : beta-alpha-beta(4)-alpha                                          |
| 20     | ZipA/FtsZ                       | TBP-like : beta-alpha-beta(4)-alpha                                          |
| 21     | ZipA/FtsZ                       | TBP-like : beta-alpha-beta(4)-alpha                                          |
| 22     | ZipA/FtsZ                       | TBP-like : beta-alpha-beta(4)-alpha                                          |
| 23     | ZipA/FtsZ                       | TBP-like : beta-alpha-beta(4)-alpha                                          |
| 24     | ZipA/FtsZ                       | TBP-like : beta-alpha-beta(4)-alpha                                          |
| 25     | Insulin/IRTK                    | Protein Kinase-like                                                          |
| 26     | IL-2/IL-2R                      | 4-helical cytokines: 4 helices                                               |
| 27     | N-type calcium channel-multimer | N/A                                                                          |
| 28     | TNF-alpha/TNFRc1                | TNF receptor-like : consists of three similar disulfide-rich domains         |
| 29     | LFA-1/ICAM-1                    | Immunoglobulin-like beta-sandwich: 7 strands in 2 sheets                     |
| 30     | LFA-1/ICAM-1                    | Immunoglobulin-like beta-sandwich: 7 strands in 2 sheets                     |
| 31     | LEF-1/beta-catenin              | High mobility group protein: 3 helices                                       |
| 32     | NGF-dimer                       | Cystine-knot cytokines : disulfide-rich fold; common core is all-beta        |
| 33     | CD28 & CTLA4/B7.1               | Immunoglobulin-like beta-sandwich: 7 strands in 2 sheets                     |
| 34     | RSV fusion protein              | Stalk segment of viral fusion proteins core: trimeric coiled coil            |
| 35     | Bcl-2                           | Toxins' membrane translocation domains: Multi-helical domains                |
| 36     | Bcl-2                           | Toxins' membrane translocation domains: Multi-helical domains                |
| 37     | Bcl-2                           | Toxins' membrane translocation domains: Multi-helical domains                |
| 38     | Bcl-2                           | Toxins' membrane translocation domains: Multi-helical domains                |
| 39     | CD4/MHCII                       | Immunoglobulin-like beta-sandwich: 7 strands in 2 sheets                     |
| 40     | CD4/MHCII                       | Immunoglobulin-like beta-sandwich: 7 strands in 2 sheets                     |
| 41     | CD4/MHCII                       | Immunoglobulin-like beta-sandwich: 7 strands in 2 sheets                     |
| 42     | CD4/MHCII                       | Immunoglobulin-like beta-sandwich: 7 strands in 2 sheets                     |
| 43     | Bcl-XL/bak                      | Toxins' membrane translocation domains: Multi-helical domains                |
| 44     | IL-1-betaRI/MyD88               | Immunoglobulin-like beta-sandwich: 7 strands in 2 sheets                     |

|    |                       |                                                                              |
|----|-----------------------|------------------------------------------------------------------------------|
| 45 | LFA-1/ICAM-1          | Immunoglobulin-like beta-sandwich: 7 strands in 2 sheets                     |
| 46 | P53/MDM2              | SWIB/MDM2 domain: core: 4 helices capped by two small 3-stranded beta-sheets |
| 47 | P53/MDM2              | SWIB/MDM2 domain: core: 4 helices capped by two small 3-stranded beta-sheets |
| 48 | P53/MDM2              | SWIB/MDM2 domain: core: 4 helices capped by two small 3-stranded beta-sheets |
| 49 | P53/MDM2              | SWIB/MDM2 domain: core: 4 helices capped by two small 3-stranded beta-sheets |
| 50 | P53/MDM2              | SWIB/MDM2 domain: core: 4 helices capped by two small 3-stranded beta-sheets |
| 51 | N/A                   | N/A                                                                          |
| 52 | Gp120/CD4             | gp120 core                                                                   |
| 53 | CCR5                  | N/A: Multi-helical domains                                                   |
| 54 | N/A                   | N/A                                                                          |
| 55 | iNOS dimer            | Nitric oxide (NO) synthase oxygenase domain: unusual fold                    |
| 56 | CCR5                  | N/A: Multi-helical domains                                                   |
| 57 | pp60c-src SH2         | SH2-like :antiparallel beta-sheet of 5 strands is flanked by two helices     |
| 58 | CCR5                  | N/A: Multi-helical domains                                                   |
| 59 | CCR5                  | N/A: Multi-helical domains                                                   |
| 60 | CCR5                  | N/A: Multi-helical domains                                                   |
| 61 | Fibrinogen/GPIIb-IIIa | Fibrinogen C-terminal domain-like:Mainly antiparallel beta sheets            |
| 62 | EPO/EPOR              | Immunoglobulin-like beta-sandwich:7 strands in 2 sheets                      |
| 63 | NGF/p75               | Cystine-knot cytokines : disulfide-rich fold; common core is all-beta        |
| 64 | Bcl-2/Bak-BH3         | Toxins' membrane translocation domains: Multi-helical domains                |
| 65 | LFA-1/ICAM-1          | Immunoglobulin-like beta-sandwich: 7 strands in 2 sheets                     |
| 66 | CRM1/NES              | alpha-alpha superhelix:alpha/alpha; right-handed superhelix                  |
