# Supplementary material for: Designing Focused Chemical Libraries Enriched in Protein-Protein Interaction Inhibitors using Machine-Learning Methods
Source: PLoS Comput Biol. 2010 Mar 5;6(3):e1000695. doi: 10.1371/journal.pcbi.1000695 (PMC2832677; doi:10.1371/journal.pcbi.1000695)
Supplement: Figure S4 — Description of the protein space coverage of the 26 PPI inhibitors of the learning data set in term SCOP fold classes. The validation data set covers 5 different PPI and 5 pairs of SCOP fold classes. (0.02 MB PDF) [file pcbi.1000695.s004.pdf]

| Ligand | PPI               | SCOP Fold                                                                                                                  |
|--------|-------------------|----------------------------------------------------------------------------------------------------------------------------|
| 1      | CD81-LEL(HCV)-E2  | Tetraspanin - 5 helices: irregular disulfide-linked array                                                                  |
| 2      | Nef-SH3/Hck       | Regulatory factor Nef - alpha(2)-beta(4)-alpha; 3 layers: alpha/beta/alpha                                                 |
| 3      | Nef-SH3/Hck       | Regulatory factor Nef - alpha(2)-beta(4)-alpha; 3 layers: alpha/beta/alpha                                                 |
| 4      | Nef-SH3/Hck       | Regulatory factor Nef - alpha(2)-beta(4)-alpha; 3 layers: alpha/beta/alpha                                                 |
| 5      | Nef-SH3/Hck       | Regulatory factor Nef - alpha(2)-beta(4)-alpha; 3 layers: alpha/beta/alpha                                                 |
| 6      | Nef-SH3/Hck       | Regulatory factor Nef - alpha(2)-beta(4)-alpha; 3 layers: alpha/beta/alpha                                                 |
| 7      | Nef-SH3/Hck       | Regulatory factor Nef - alpha(2)-beta(4)-alpha; 3 layers: alpha/beta/alpha                                                 |
| 8      | Hsp90/cdc37       | ATPase domain of HSP90 chaperone/DNA topoisomerase II/histidine kinase - 8-stranded mixed beta-sheet; 2 layers: alpha/beta |
| 9      | Nef-SH3/Hck       | Regulatory factor Nef - alpha and beta protein                                                                             |
| 10     | STAT3/STAT3 dimer | STAT-like - 4 long helices; bundle, left-handed twist (coiled coil); right-handed superhelix                               |
| 11     | STAT3/STAT3 dimer | STAT-like - 4 long helices; bundle, left-handed twist (coiled coil); right-handed superhelix                               |
| 12     | CD81-LEL(HCV)-E2  | Tetraspanin - 5 helices: irregular disulfide-linked array                                                                  |
| 13     | p53/MDM2          | SWIB/MDM2 domain: core: 4 helices capped by two small 3-stranded beta-sheets                                               |
| 14     | p53/MDM2          | SWIB/MDM2 domain: core: 4 helices capped by two small 3-stranded beta-sheets                                               |
| 15     | p53/MDM2          | SWIB/MDM2 domain: core: 4 helices capped by two small 3-stranded beta-sheets                                               |
| 16     | p53/MDM2          | SWIB/MDM2 domain: core: 4 helices capped by two small 3-stranded beta-sheets                                               |
| 17     | p53/MDM2          | SWIB/MDM2 domain: core: 4 helices capped by two small 3-stranded beta-sheets                                               |
| 18     | p53/MDM2          | SWIB/MDM2 domain: core: 4 helices capped by two small 3-stranded beta-sheets                                               |
| 19     | p53/MDM2          | SWIB/MDM2 domain: core: 4 helices capped by two small 3-stranded beta-sheets                                               |
| 20     | p53/MDM2          | SWIB/MDM2 domain: core: 4 helices capped by two small 3-stranded beta-sheets                                               |
| 21     | p53/MDM2          | SWIB/MDM2 domain: core: 4 helices capped by two small 3-stranded beta-sheets                                               |
| 22     | p53/MDM2          | SWIB/MDM2 domain: core: 4 helices capped by two small 3-stranded beta-sheets                                               |
| 23     | p53/MDM2          | SWIB/MDM2 domain: core: 4 helices capped by two small 3-stranded beta-sheets                                               |
| 24     | p53/MDM2          | SWIB/MDM2 domain: core: 4 helices capped by two small 3-stranded beta-sheets                                               |
| 25     | p53/MDM2          | SWIB/MDM2 domain: core: 4 helices capped by two small 3-stranded beta-sheets                                               |
| 26     | p53/MDM2          | SWIB/MDM2 domain: core: 4 helices capped by two small 3-stranded beta-sheets                                               |
